# Supplementary material
Source: PubMed Central journal article supplement (PMC2277221)
Supplement: tjp583-0081-SD1.pdf [file tjp583-0081-SD1.pdf]

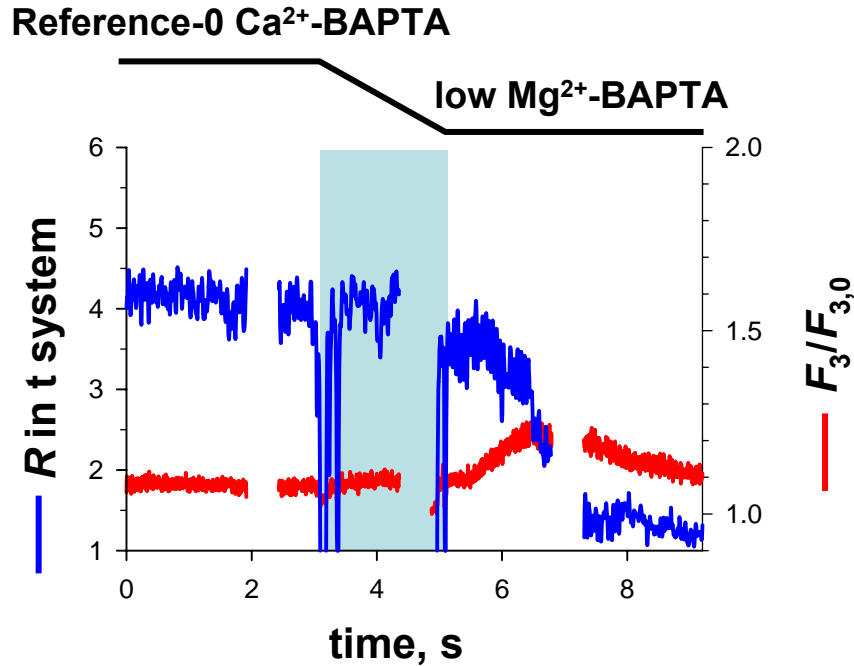

Supplementary Fig 1: SOCE with suppressed change in  $[Ca^{2+}]_{cyto}$ . A,  $F_3$  and B,  $R$  in t system, acquired while changing from a solution with 5 mM BAPTA, 0 Ca and 0.65 mM  $Mg^{2+}$  to release-inducing low  $Mg^{2+}$ -BAPTA. C, spatially averaged  $F_3/F_{3,0}$  (red) and  $R$  (blue) vs. elapsed time, which directly correspond to time and y axis in A and B. This figure includes the signals from the resting cell, and shows that they are reasonably uniform before release-inducing solution is substituted for reference-0  $Ca^{2+}$ -BAPTA. Other details as in Fig 4. ID: 072805f\_s012.
